# Supplementary material for: Cyclosporine A but Not Corticosteroids Support Efficacy of Ex Vivo Expanded, Adoptively Transferred Human Tregs in GvHD
Source: PubMed Central journal article supplement (PMC8543016; doi:10.3389/fimmu.2021.716629), 2021-10-11
Supplement: DataSheet_1.pdf [file DataSheet_1.pdf]

## Supplementary Material to

### **Cyclosporine A but Not Corticosteroids Support Efficacy of Ex Vivo Expanded, Adoptively Transferred Human Tregs in GvHD**

Sybille Landwehr-Kenzel <sup>1,2,3\*</sup>, Anne Zobel <sup>2</sup>, Isabela Schmitt-Knosalla <sup>4</sup>, Anne Forke <sup>2</sup>, Henrike Hoffmann <sup>2</sup>, Michael Schmueck-Henneresse <sup>2,3</sup>, Robert Klopffleisch <sup>5</sup>, Hans-Dieter Volk <sup>2,3,4</sup>, and Petra Reinke <sup>2,3,6</sup>

<sup>1</sup> Department of Pediatric Respiratory Medicine, Immunology and Critical Care Medicine, Charité – Universitätsmedizin Berlin, Corporate Member of Freie Universität Berlin and Humboldt-Universität zu Berlin, Berlin, Germany, <sup>2</sup> Berlin Institute of Health (BIH) at Charité – Universitätsmedizin Berlin, BIH-Center for Regenerative Therapies (BCRT), Berlin, Germany, <sup>3</sup> Charité - Universitätsmedizin Berlin, Corporate Member of Freie Universität Berlin and Humboldt-Universität zu Berlin, Berlin Center for Advanced Therapies (BeCAT), Berlin, Germany, <sup>4</sup> Charité – Universitätsmedizin Berlin, Corporate Member of Freie Universität Berlin and Humboldt-Universität zu Berlin, Institute of Medical Immunology, Berlin, Germany, <sup>5</sup> Department of Veterinary Medicine, Institute of Veterinary Pathology, Freie Universität Berlin, Berlin, Germany, <sup>6</sup> Department of Nephrology and Internal Intensive Care Medicine, Charité – Universitätsmedizin Berlin, Corporate Member of Freie Universität Berlin and Humboldt-Universität zu Berlin, Berlin, Germany.

**Supplementary Table ST1: GvHD scoring based on clinical signs.**

| <b>Clinical Score</b> | <b>Clinical status</b>                                                                             |
|-----------------------|----------------------------------------------------------------------------------------------------|
| 0                     | no GvHD: clinically healthy                                                                        |
| 1                     | mild GvHD: weight loss < 10%, mild pallor, slightly scurfy fur.                                    |
| 1.5                   | mild GvHD: weight loss < 10%, mild pallor, slightly scurfy fur, streaky tail                       |
| 2                     | moderate GvHD: weight loss 10-15 %, pale, scurfy fur, streaky tail, hunched back                   |
| 2.5                   | moderate GvHD: weight loss 10-15 %, pale, scurfy fur, streaky tail, hunched back, reduced mobility |
| 3                     | severe GvHD: weight loss 15-20% plus strongly hunched back, minimal mobility or immobile           |

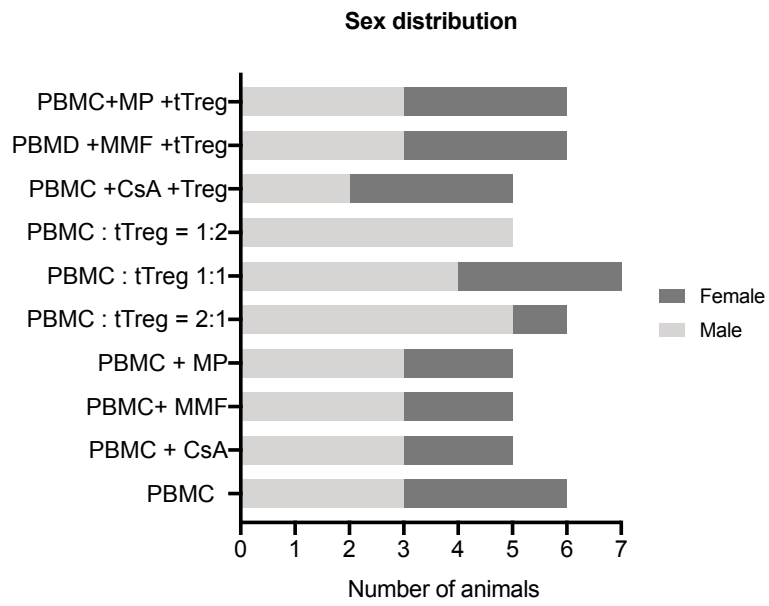

**Supplementary Figure S1: Sex distribution of animals.** All animals used were adult male and female Balb/c NOD/SCID IL-2Rgamma<sup>-/-</sup> mice. We aimed for equal distribution of male and female animals to all groups. Depicted are numbers of male and female animals for all individual treatment groups.

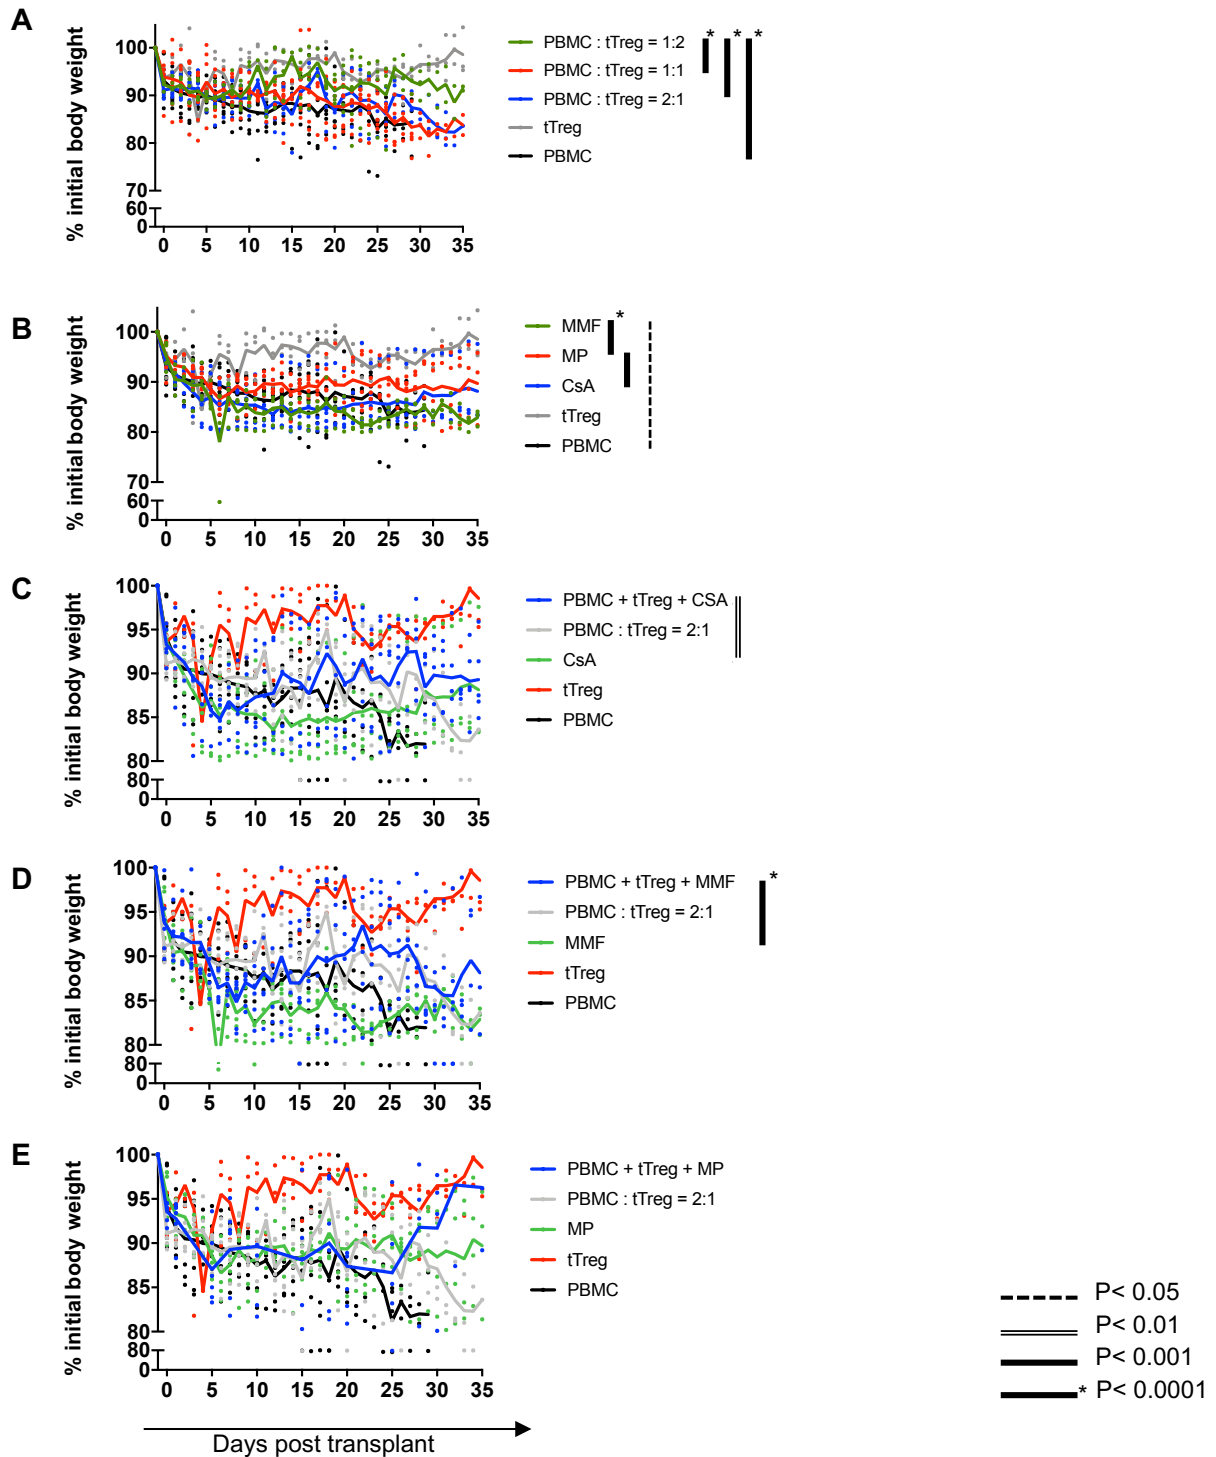

**Supplementary Figure S2: Clinical course and survival rates.** As described in Fig. 1 GvHD was induced in NOD/SCID/IL-2Rgamma<sup>-/-</sup> mice by infusion of  $3 \times 10^6$  human PBMC (GvHD control, A – E). tReg control mice received no PBMCs but  $3 \times 10^6$  *ex vivo* expanded human tTregs alone (tReg control, A – E). (A) In parallel to GvHD induction with PBMCs, mice were treated with escalating doses of *ex vivo* expanded tTregs at a ratio of 2:1 (n=6), 1:1 (n=7) or 1:2 (n=5). (B) Alternatively, mice were treated with the cISD (C) CSA (4 mg/kg s.c.), (D) MMF (0.5 mg p. o.) or (E) MP (20 mg/kg i.p.) (each group n=5) alone or (C-E) in combination with tReg (PBMC:tReg ratio 2:1). Statistical analysis was performed as One-Way-ANOVA with Tukey correction for multiple comparison. Statistical significance levels are indicated as  $p < 0.05$ ,  $p < 0.01$ ,  $p < 0.001$ ,  $p < 0.0001$ . CSA: Cyclosporine A, MMF: Mycophenolate Mofetil, MP: Methylprednisolone.

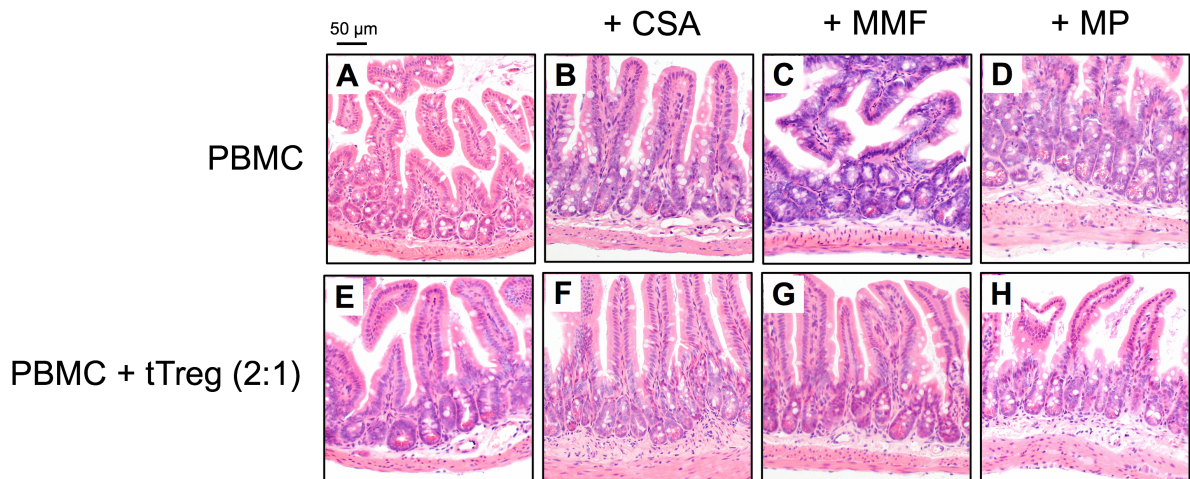

**Supplementary Figure S3: Histopathological findings of the intestinal tract.** Intestinal samples of all mice were stained by hematoxylin and eosin (H&E). No signs of GvHD such as cellular infiltration, apoptotic epithelia cells or changes in the tissue architecture were detected. Shown are representative photographs from intestinal samples of mice which received (A) PBMCs only, PBMCs plus one of the cISD (B) CSA, (C) MMF, (D) MP, (E) PBMCs plus tTregs or PBMC and coadministration of (F) CSA/tTreg, (G) MMF/tTregs or (H) MP/tTregs.
